# Supplementary material
Source: PubMed Central journal article supplement (PMC3909551)
Supplement: cbt-14-823-s01.pdf [file cbt-14-823-s01.pdf]

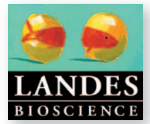

## **Supplemental Material to:**

**Krzysztof Wojcik, Miroslav Zarebski, Andrea Cossarizza  
and Jurek W. Dobrucki**

**Daunomycin, an antitumor DNA intercalator, influences  
histone-DNA interactions**

**Cancer Biology & Therapy 2013; 14(9)**

**<http://dx.doi.org/10.4161/cbt.25328>**

**<http://www.landesbioscience.com/journals/cbt/article/25328/>**

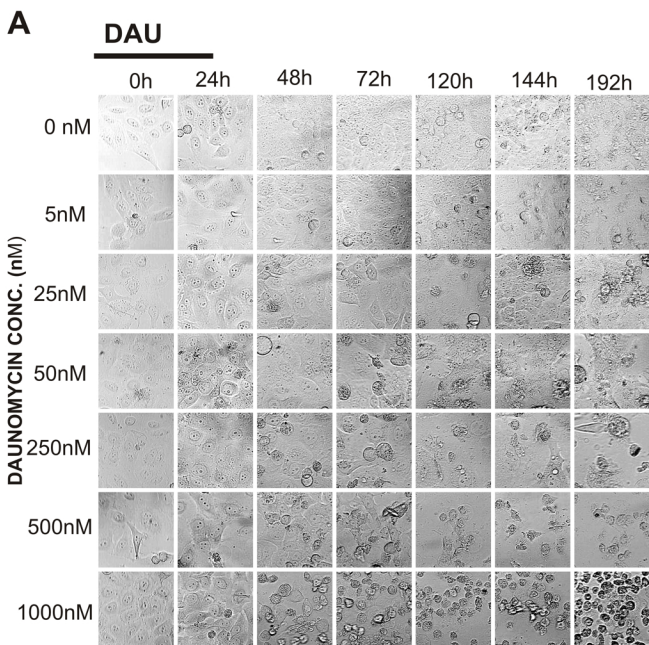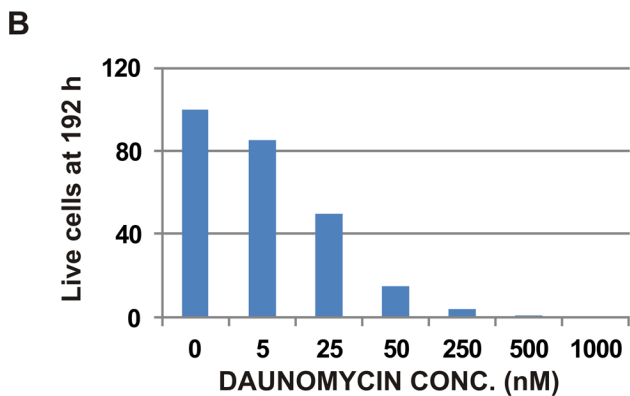

Suppl. Table S1. Morphological changes of cells expressing eGFP-H1.1 or eGFP-H2B, treated with daunomycin

| Cells expressing eGFP-H1.1 |                      |     |     |       |       |       |       |
|----------------------------|----------------------|-----|-----|-------|-------|-------|-------|
|                            | Time with daunomycin |     |     |       |       |       |       |
| Dau [nM]                   | 0,5 h                | 1h  | 2h  | 4h    | 24h   | 48h   | 72h   |
| 25                         |                      |     |     |       | 0 ○ A | 0 ○ A | 0 ○ A |
| 100                        |                      |     |     |       | X ○ A | X ○ A |       |
| 250                        |                      |     |     |       | X ○ A |       |       |
| 500                        |                      |     | X ● | X ●/○ |       |       |       |
| 1000                       | X ●                  | X ● | X ● |       |       |       |       |
| 2000                       | X ●                  | X ● | X ● |       |       |       |       |

| Cells expressing eGFP-H2B |                      |     |     |     |       |       |       |
|---------------------------|----------------------|-----|-----|-----|-------|-------|-------|
|                           | Time with daunomycin |     |     |     |       |       |       |
| Dau [nM]                  | 0,5 h                | 1h  | 2h  | 4h  | 24h   | 48h   | 72h   |
| 25                        |                      |     |     |     | 0 ○ A | 0 ○ A | 0 ○ A |
| 100                       |                      |     |     |     | 0 ○ A | 0 ○ A |       |
| 250                       |                      |     |     |     | 0 ○ A |       |       |
| 500                       |                      | X ○ | X ○ | X ○ |       |       |       |
| 1000                      | X ○                  | X ○ | X ○ |     |       |       |       |
| 2000                      | X ●                  | X ● | X ● |     |       |       |       |

Legend: X - chromatin condensation, ● – fluorescence of daunomycin, ○ – fluorescence of daunomycin undetectable, A – apoptosis
